# Supplementary material for: Construction of a crystalline 14-metal Zn–Nd rectangular nanocluster with a dual-emissive response towards metal ions
Source: Royal Society of Chemistry journal article supplement (doi:10.1039/c9ra09409a), 2019-01-01
Supplement: c9ra09409a1.pdf [file c9ra09409a1.pdf]

## Supporting Information

### **Construction of a Crystalline 14-metal Zn-Nd Rectangular Nanocluster with Dual-emissive Response towards Metal Ions**

Jieni Liu, Xiaoping Yang, Ting Zhu, Bichen Yuan, Hongfen Chen, Dongliang Shi, Desmond Schipper and Richard A. Jones

#### **Contents**

|                                                                              |     |
|------------------------------------------------------------------------------|-----|
| 1. General Procedures .....                                                  | S2  |
| 2. The IR spectra of the free ligand H <sub>2</sub> L and <b>1</b> .....     | S3  |
| 3. Powder XRD patterns of <b>1</b> .....                                     | S3  |
| 4. The thermogravimetric analysis of <b>1</b> .....                          | S4  |
| 5. The NIR lanthanide luminescence lifetimes of <b>1</b> .....               | S4  |
| 6. NIR lanthanide luminescent sensing of <b>1</b> towards metal ions.....    | S5  |
| 7. Visible emission response of <b>1</b> to metal ions.....                  | S9  |
| 8. The radii of added metal ions.....                                        | S13 |
| 9. UV-Vis spectra of <b>1</b> with the addition of Co <sup>2+</sup> ion..... | S13 |
| 10. X-Ray Crystallography.....                                               | S14 |

## **1. General Procedures**

Metal salts and solvents were purchased from Meryer and used directly without further purification. All reactions were performed under dry oxygen-free dinitrogen atmospheres using standard Schlenk techniques. Physical measurements: NMR: AVANCE III AV500. 500 spectrometer ( $^1\text{H}$ , 500 MHz) at 298 K; IR: Nicolet IS10 spectrometer; Powder XRD: D8ADVANCE. Elemental analyses (C, H, N) of compounds were carried out on a EURO EA3000 elemental analysis after dried in an oven at 120°C for 2 h. Melting points were obtained in sealed glass capillaries under dinitrogen and are uncorrected. The thermogravimetric analyses (TA) were carried out on a TA Instruments Q600. Field emission scanning electron microscopy (FESEM) images and EDX spectra were recorded on a Nova NanoSEM 200 scanning electron microscope. Conductivity measurement was carried out with a DDS-11 conductivity bridge for  $10^{-4}$  M solution in  $\text{CH}_3\text{CN}$ . Absorption spectra were obtained on a UV-3600 spectrophotometer.

**Photophysical Studies** Visible and NIR luminescence spectra were recorded on a FLS 980 fluorimeter. The light source for the spectra was a 450 W xenon arc lamp with continuous spectral distribution from 190 to 2600 nm. Liquid nitrogen cooled Ge PIN diode detector was used to detect the NIR emissions from 800 nm to 1700 nm. The temporal decay curves of the fluorescence signals were stored by using the attached storage digital oscilloscope. The quantum yields ( $\Phi_{\text{em}}$ ) were obtained by using an integrating sphere, according to eqn  $\Phi_{\text{em}} = N_{\text{em}} / N_{\text{abs}}$ , where  $N_{\text{em}}$  and  $N_{\text{abs}}$  are the numbers of emitted and absorbed photons, respectively. Systematic errors have been deducted through the standard instrument corrections. All the measurements were carried out at room temperature.

## 2. The IR spectra of the free ligand H<sub>2</sub>L and 1

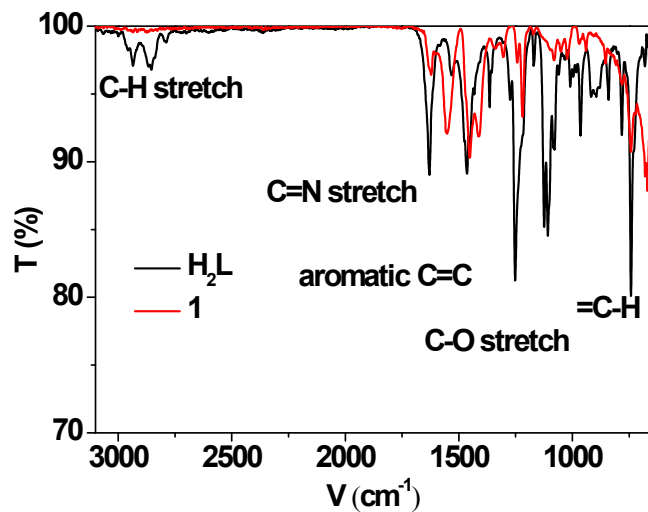

Figure S1. The IR spectra of the free ligand H<sub>2</sub>L and 1.

## 3. Powder XRD patterns of 1

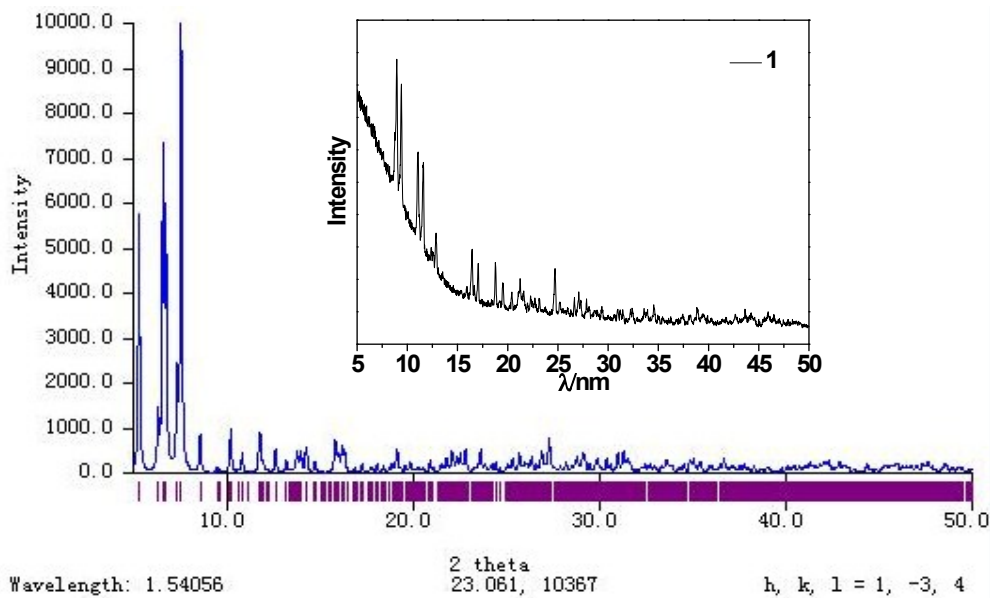

Figure S2. Powder XRD patterns of 1.

#### 4. The thermogravimetric analysis of 1

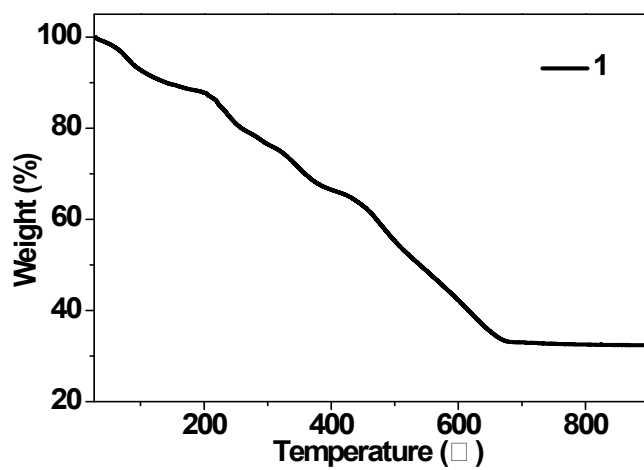

Figure S3. The thermogravimetric analysis of 1.

#### 5. The NIR lanthanide luminescence lifetime of 1

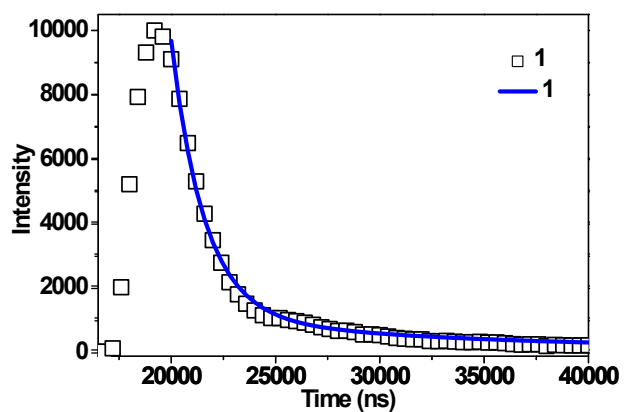

Figure S4. The NIR lanthanide luminescence lifetime of 1 in CH<sub>3</sub>CN.

## 6. NIR lanthanide luminescent sensing of 1 towards metal ions

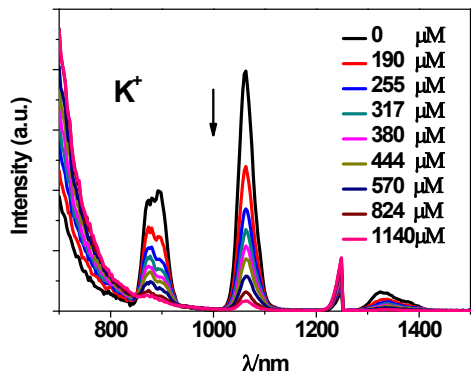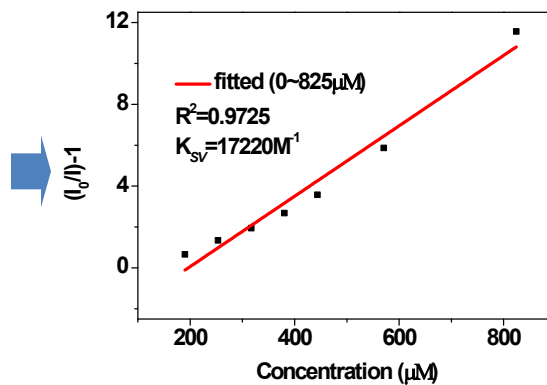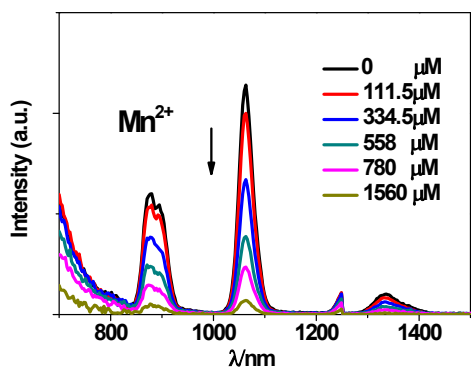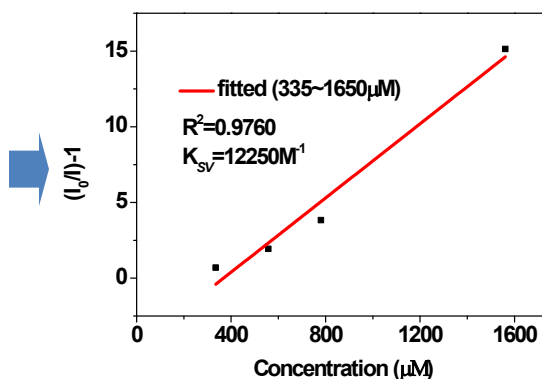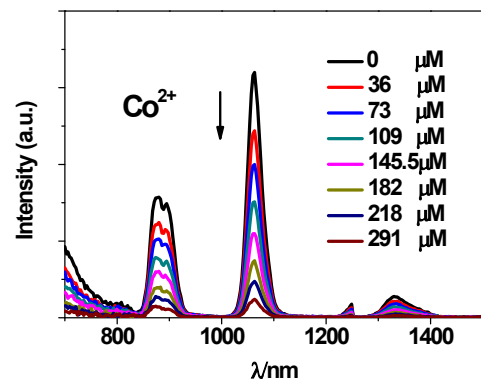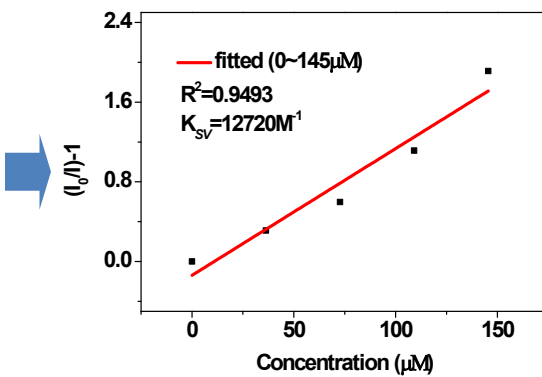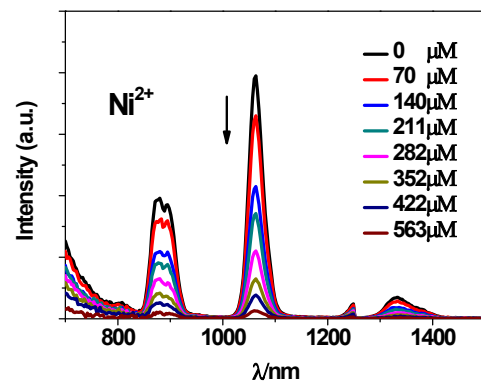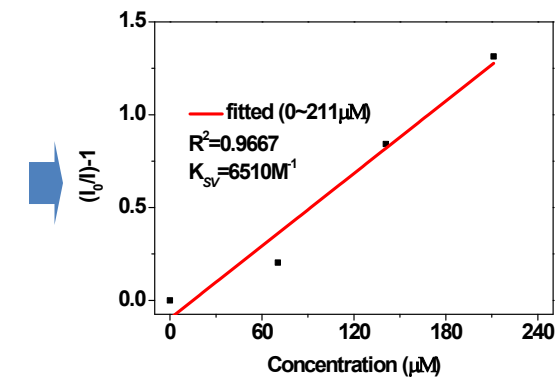

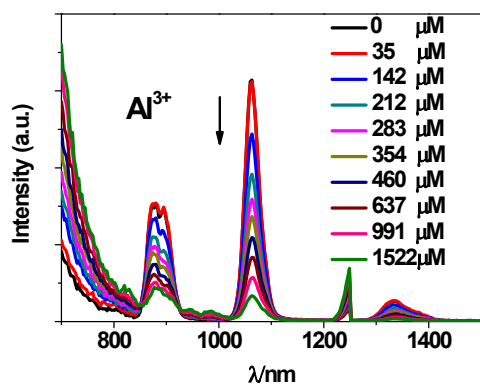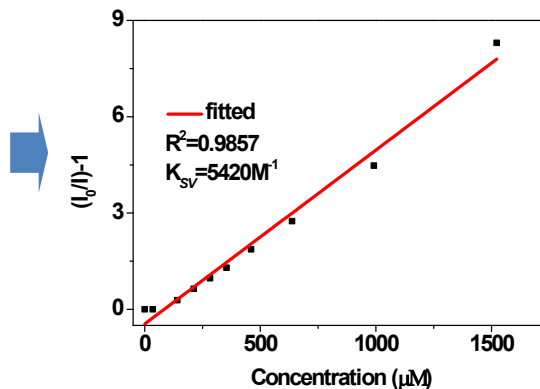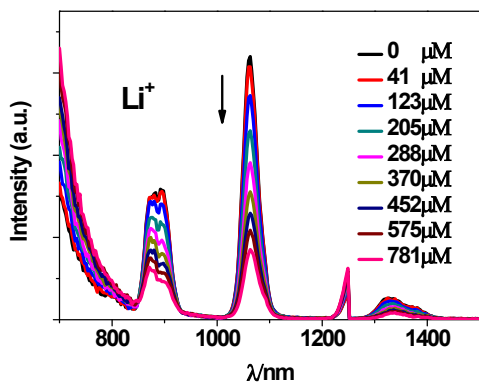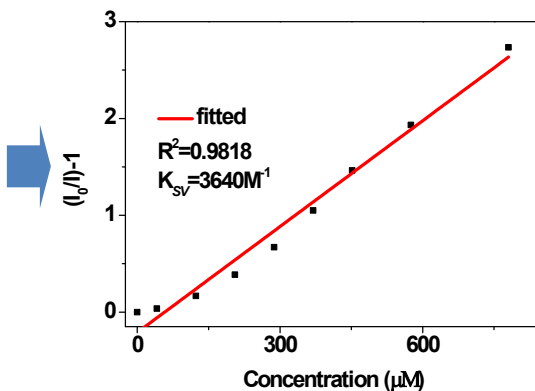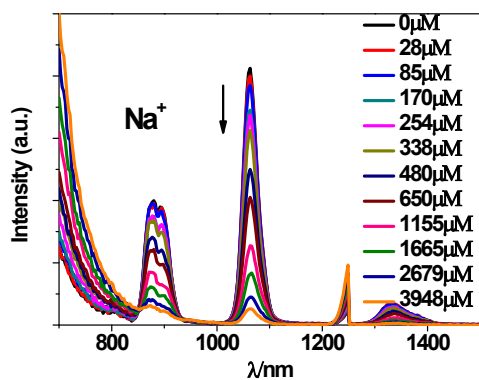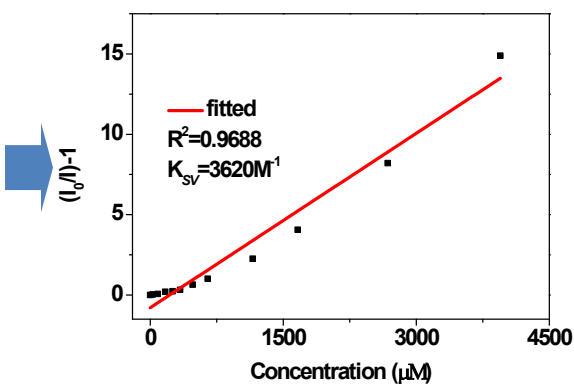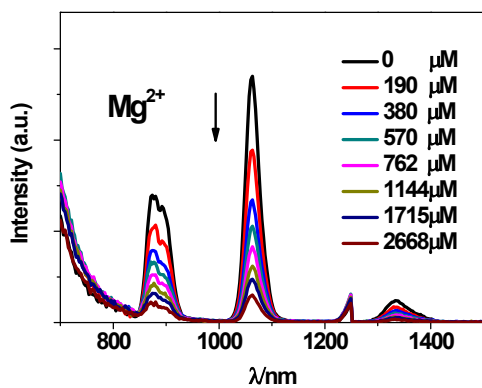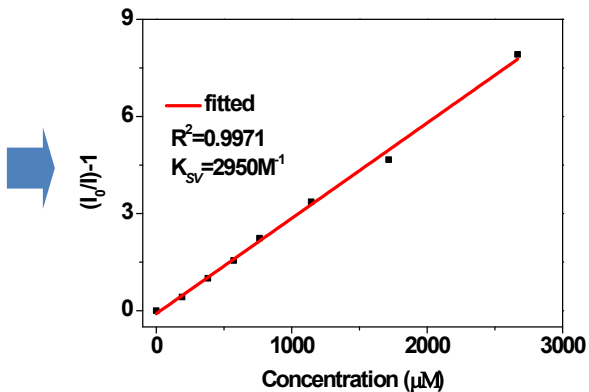

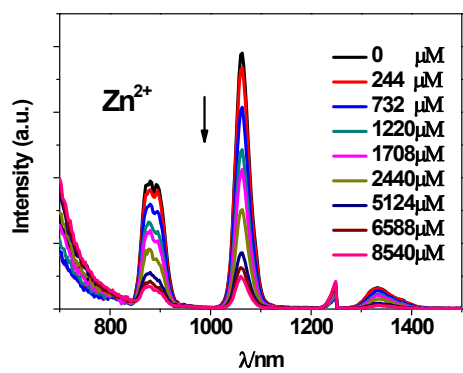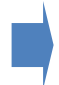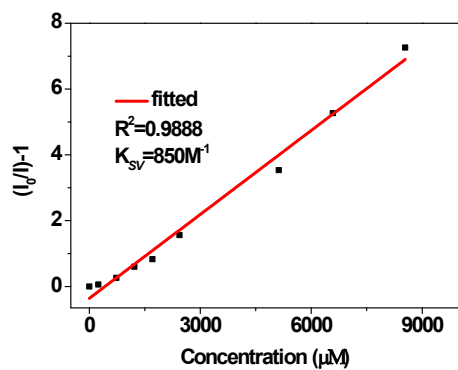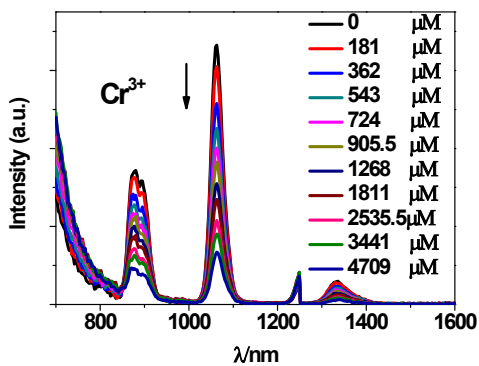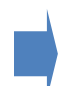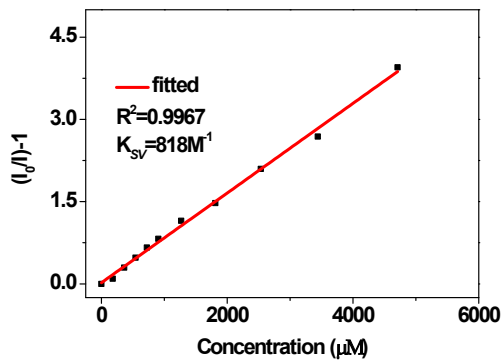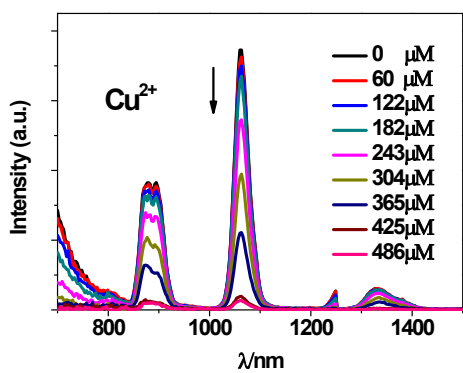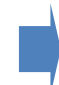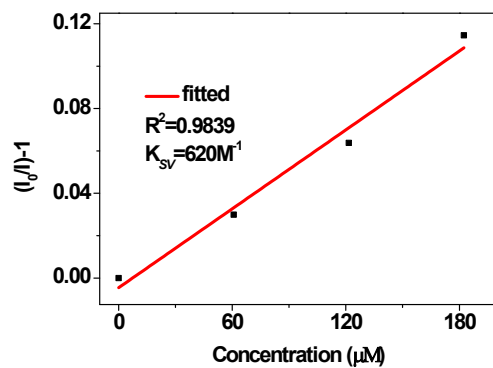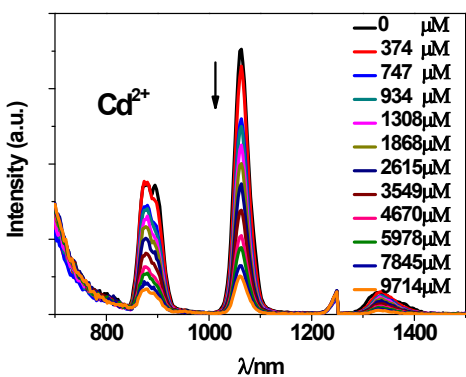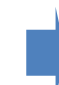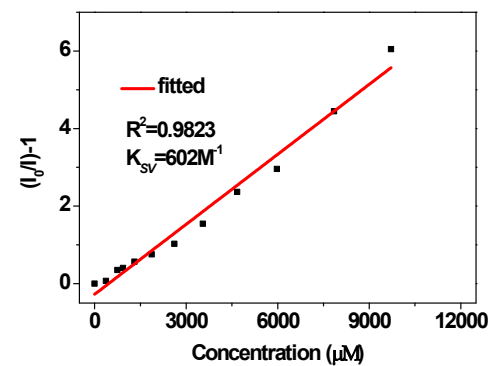

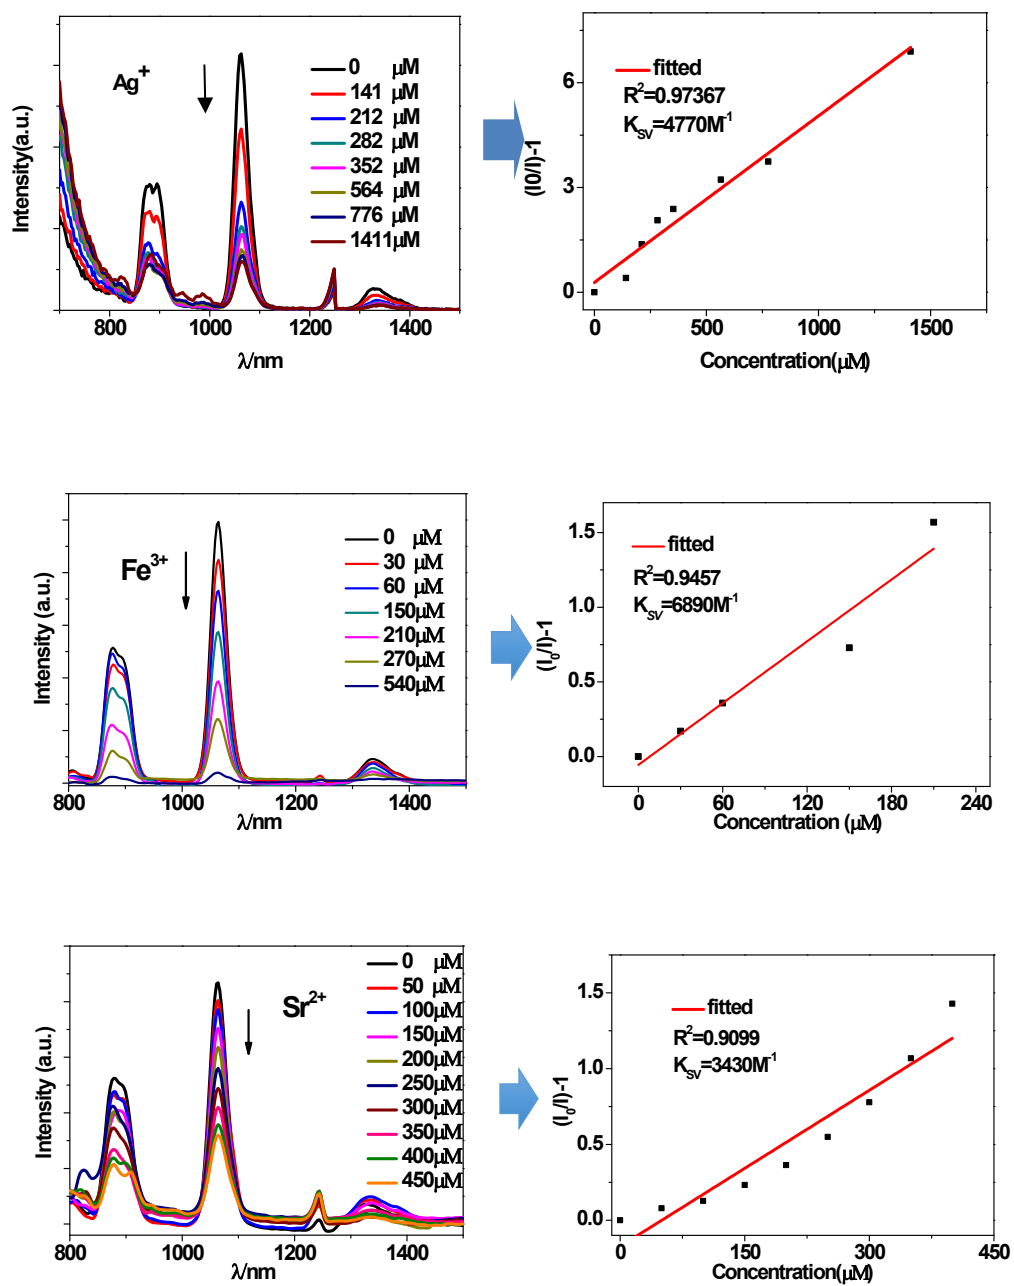

Figure S5. NIR lanthanide Luminescent sensing of **1** (60  $\mu\text{M}$ ) towards metal ions.



## 7. Visible emission response of 1 to metal ions

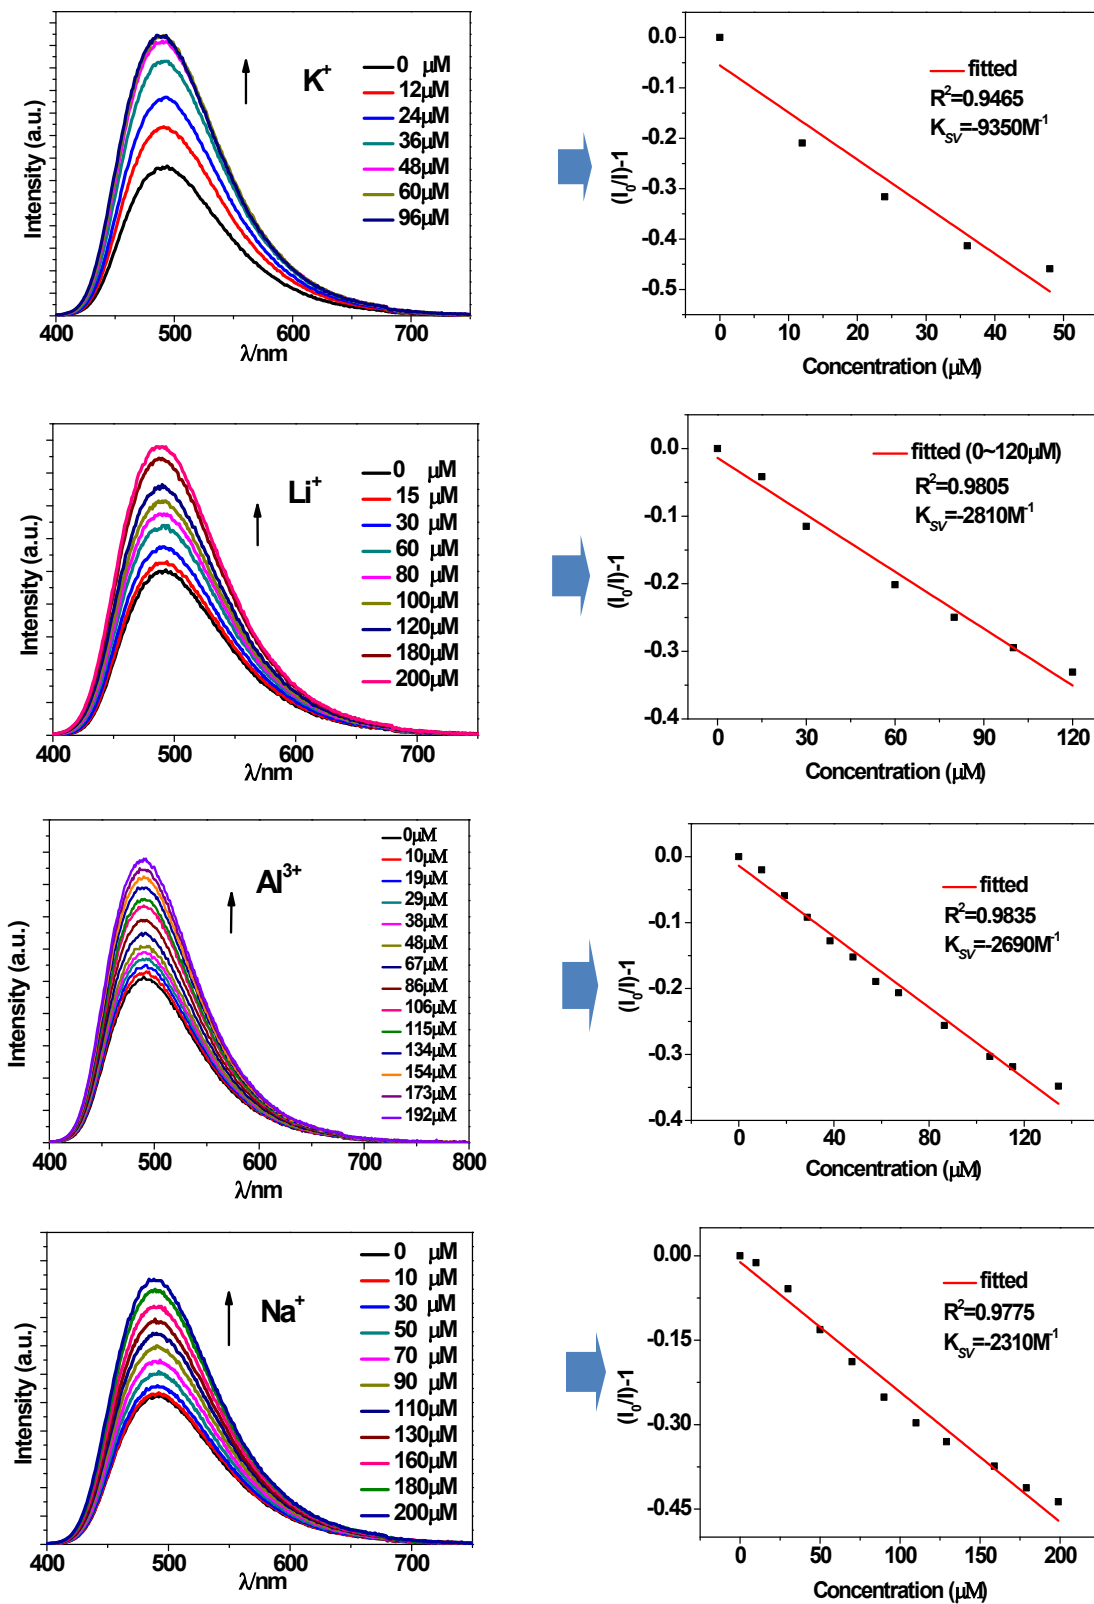

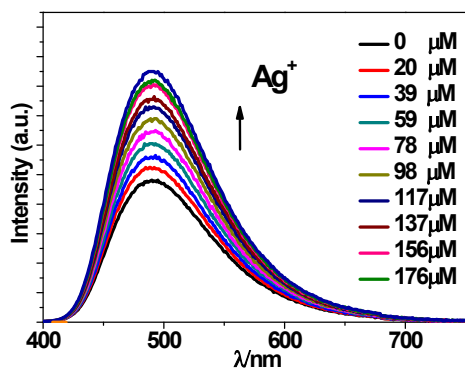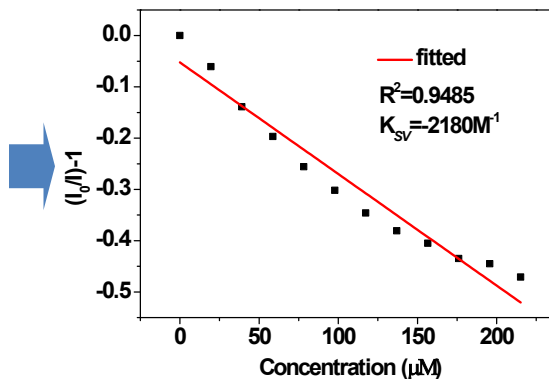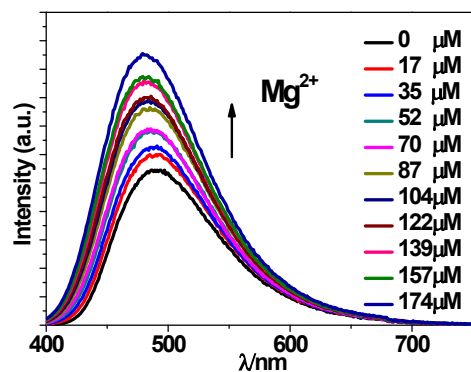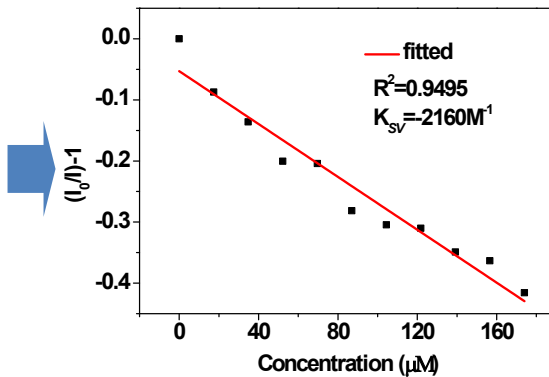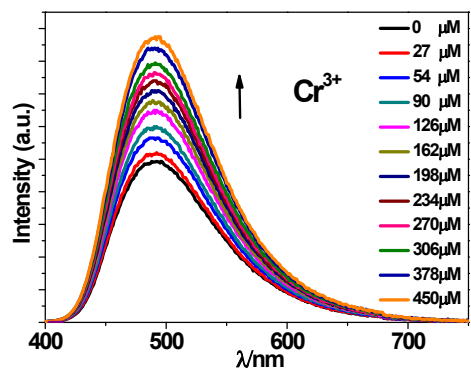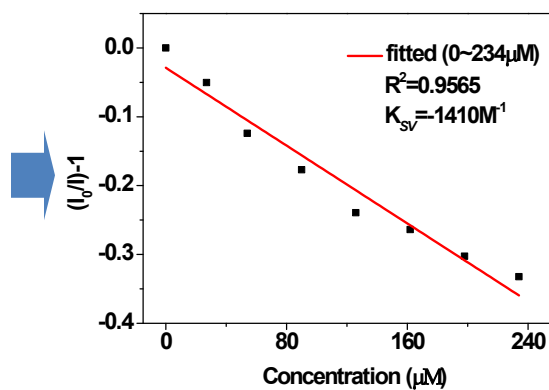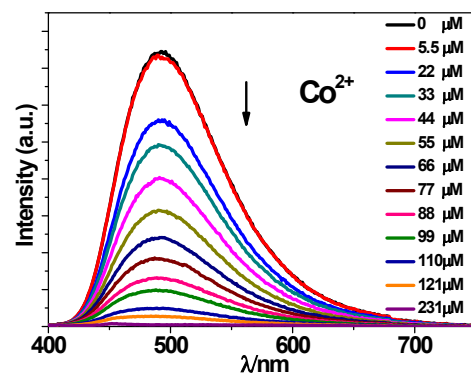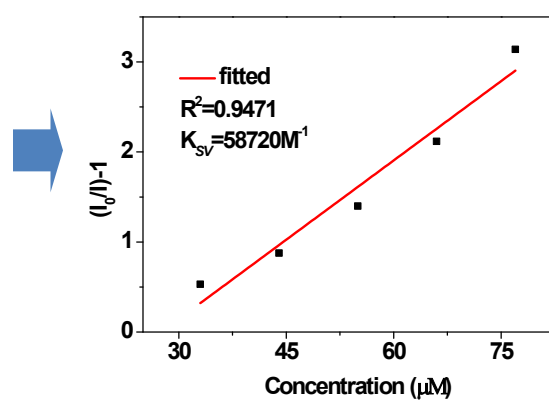

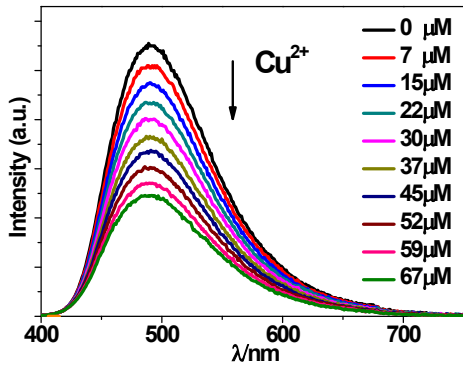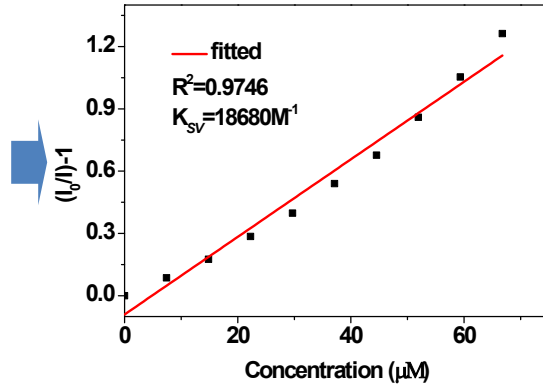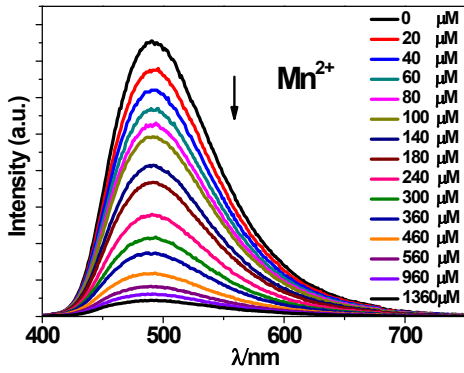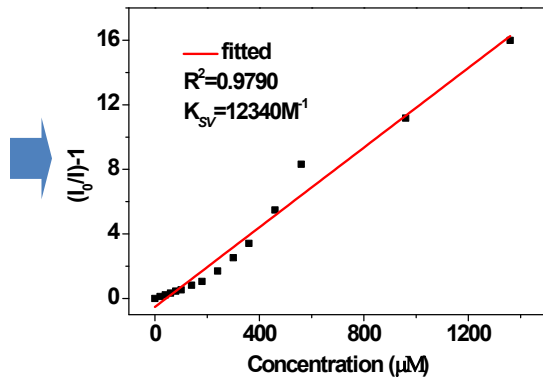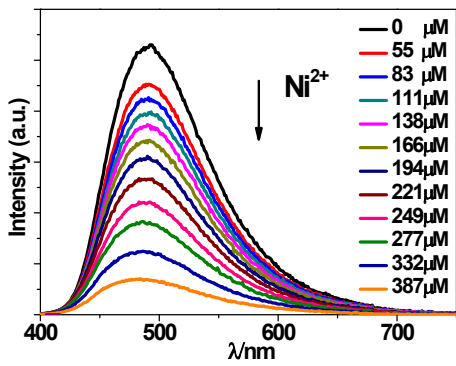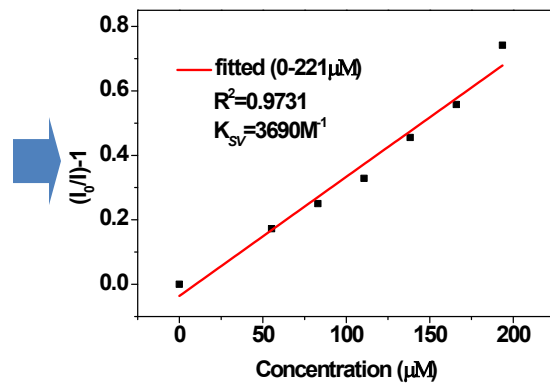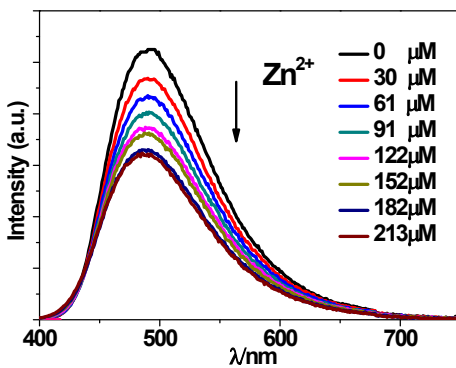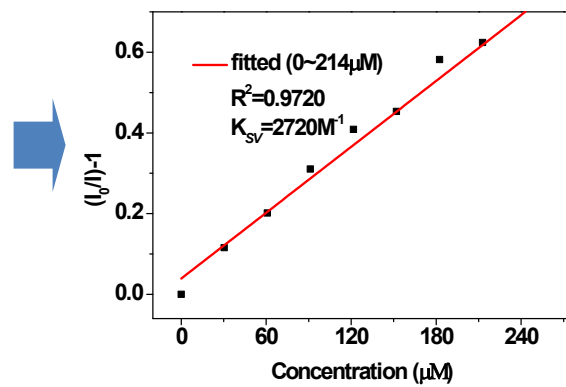

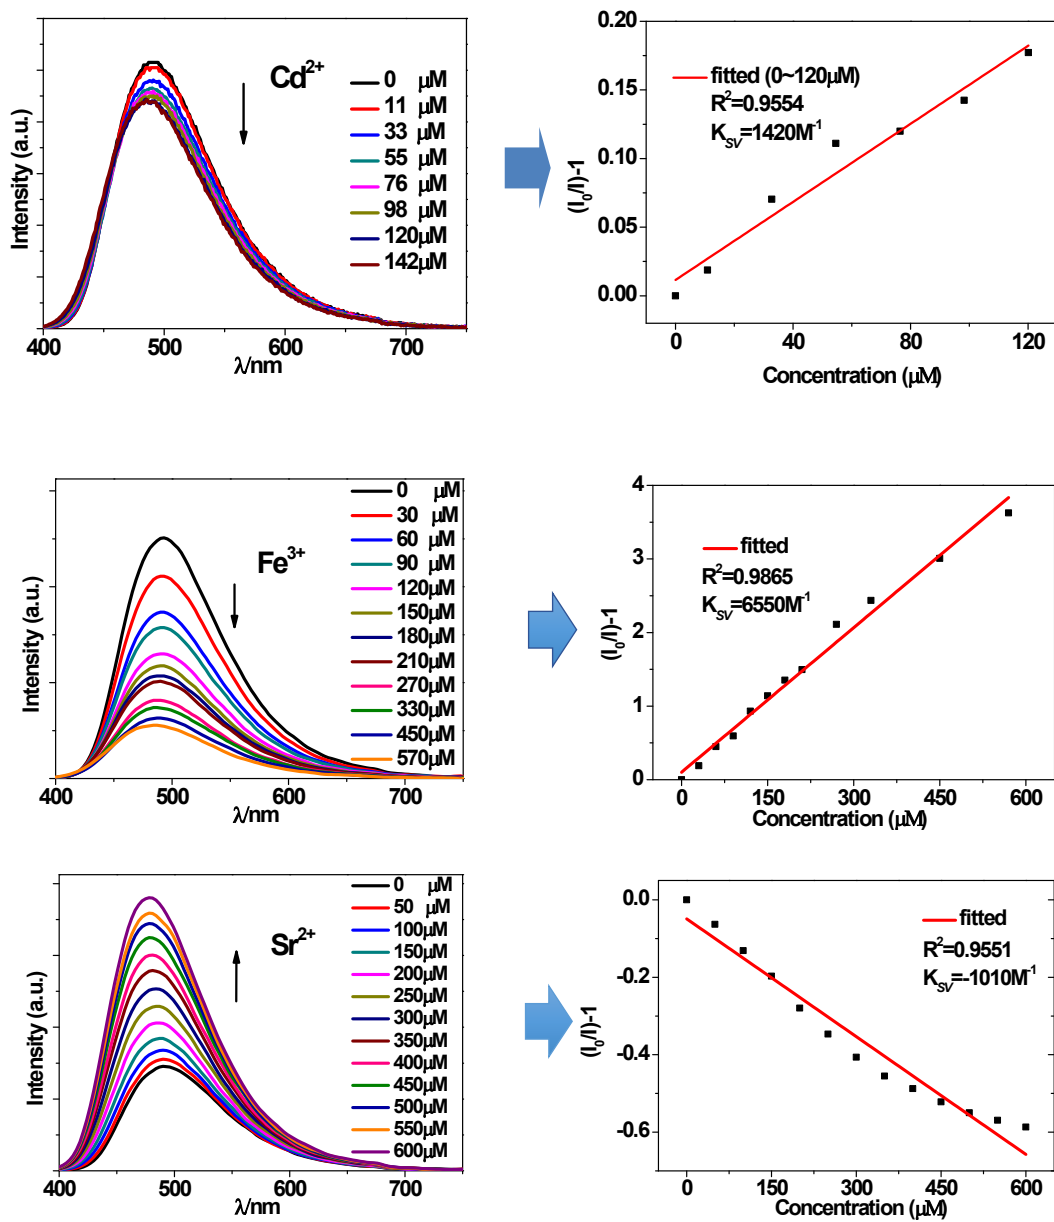

Figure S6. Visible emission response of **1** (60 μM) to metal ions.

## 8. The radii of added metal ions

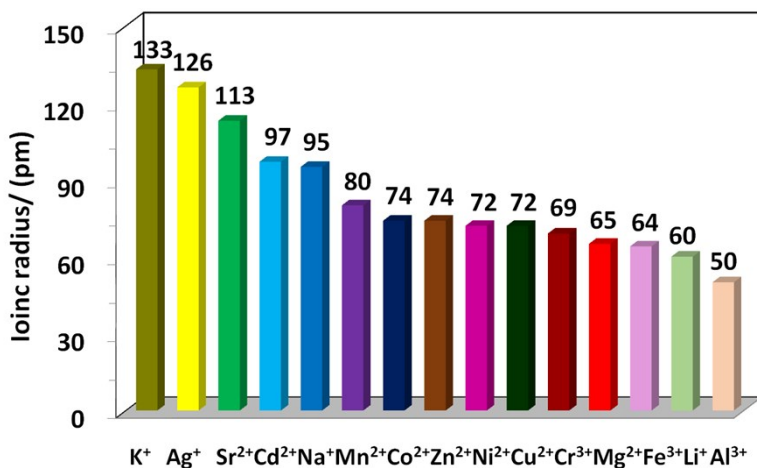

Figure S7. The radii of added metal ions.

## 9. UV-Vis spectra of 1 with the addition of Co<sup>2+</sup> ion

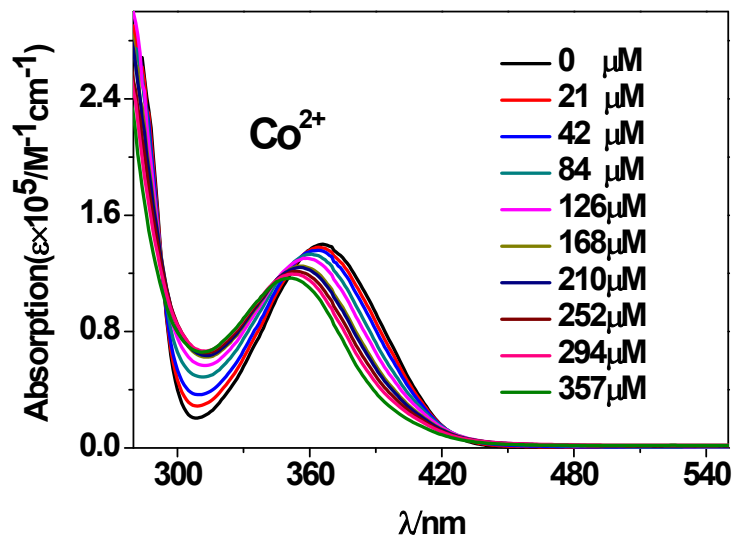

Figure S7. UV-Vis spectra of 1 (60 μM) with the addition of Co<sup>2+</sup> ion.

## 10. X-Ray crystallography

Table S1. Selected Bond Lengths (Å) and Angles (°) for **1**.

---

|               |          |                   |            |
|---------------|----------|-------------------|------------|
| Nd(1)-O(2)    | 2.485(4) | Zn(2)-O(22)       | 1.982(6)   |
| Nd(1)-O(27)   | 2.493(4) | Zn(2)-O(29)       | 2.098(4)   |
| Nd(1)-O(12)   | 2.498(5) | Zn(2)-O(33)       | 2.444(9)   |
| Nd(1)-O(10)   | 2.500(4) | Zn(3)-O(34)       | 1.934(5)   |
| Nd(1)-O(8)    | 2.540(4) | Zn(3)-O(13)       | 1.951(5)   |
| Nd(1)-O(31)   | 2.547(5) | Zn(3)-O(15)       | 1.964(5)   |
| Nd(1)-O(26)   | 2.608(4) | Zn(3)-O(30)       | 2.005(4)   |
| Nd(1)-O(9)    | 2.624(4) | O(2)-Nd(1)-O(27)  | 63.52(13)  |
| Nd(1)-O(7)    | 2.627(4) | O(2)-Nd(1)-O(12)  | 138.09(14) |
| Nd(1)-O(1)    | 2.653(4) | O(27)-Nd(1)-O(12) | 140.83(14) |
| Nd(1)-N(3)    | 2.916(6) | O(2)-Nd(1)-O(10)  | 76.71(15)  |
| Nd(2)-O(21)#1 | 2.395(4) | O(27)-Nd(1)-O(10) | 77.43(14)  |
| Nd(2)-O(14)   | 2.408(5) | O(12)-Nd(1)-O(10) | 78.62(15)  |
| Nd(2)-O(9)    | 2.414(4) | O(2)-Nd(1)-O(8)   | 92.09(14)  |
| Nd(2)-O(16)   | 2.442(5) | O(27)-Nd(1)-O(8)  | 142.16(15) |
| Nd(2)-O(20)   | 2.493(4) | O(12)-Nd(1)-O(8)  | 76.69(16)  |
| Nd(2)-O(11)   | 2.507(4) | O(10)-Nd(1)-O(8)  | 127.14(15) |
| Nd(2)-O(19)#1 | 2.608(4) | O(2)-Nd(1)-O(31)  | 72.08(14)  |
| Nd(2)-O(30)   | 2.664(4) | O(27)-Nd(1)-O(31) | 72.40(13)  |
| Nd(2)-O(26)   | 2.666(4) | O(12)-Nd(1)-O(31) | 137.61(14) |
| Nd(3)-O(18)   | 2.408(4) | O(10)-Nd(1)-O(31) | 143.70(15) |
| Nd(3)-O(7)    | 2.440(4) | O(8)-Nd(1)-O(31)  | 72.66(15)  |
| Nd(3)-O(21)#1 | 2.451(4) | O(2)-Nd(1)-O(26)  | 111.29(13) |
| Nd(3)-O(19)   | 2.486(4) | O(27)-Nd(1)-O(26) | 51.33(12)  |
| Nd(3)-O(21)   | 2.496(4) | O(12)-Nd(1)-O(26) | 107.68(13) |
| Nd(3)-O(28)   | 2.502(4) | O(10)-Nd(1)-O(26) | 105.58(13) |
| Nd(3)-O(11)   | 2.543(4) | O(8)-Nd(1)-O(26)  | 126.24(13) |
| Nd(3)-O(26)#1 | 2.545(4) | O(31)-Nd(1)-O(26) | 70.19(14)  |
| Nd(3)-O(23)   | 2.585(4) | O(2)-Nd(1)-O(9)   | 115.47(13) |
| Nd(3)-N(3)#1  | 2.970(6) | O(27)-Nd(1)-O(9)  | 70.80(13)  |
| Nd(4)-O(17)   | 2.413(5) | O(12)-Nd(1)-O(9)  | 70.04(14)  |
| Nd(4)-O(32)   | 2.429(4) | O(10)-Nd(1)-O(9)  | 50.05(13)  |
| Nd(4)-O(25)   | 2.432(5) | O(8)-Nd(1)-O(9)   | 146.46(15) |
| Nd(4)-O(5)    | 2.472(4) | O(31)-Nd(1)-O(9)  | 132.04(14) |
| Nd(4)-O(35)   | 2.489(5) | O(26)-Nd(1)-O(9)  | 63.01(13)  |
| Nd(4)-O(28)   | 2.502(4) | O(2)-Nd(1)-O(7)   | 130.70(13) |
| Nd(4)-O(23)   | 2.529(4) | O(27)-Nd(1)-O(7)  | 124.73(12) |
| Nd(4)-O(29)   | 2.561(4) | O(12)-Nd(1)-O(7)  | 70.73(14)  |
| Nd(4)-O(6)    | 2.615(4) | O(10)-Nd(1)-O(7)  | 148.95(15) |
| Nd(4)-N(4)    | 2.959(6) | O(8)-Nd(1)-O(7)   | 50.21(13)  |
| Zn(1)-O(5)    | 2.064(4) | O(31)-Nd(1)-O(7)  | 67.24(13)  |
| Zn(1)-O(2)#1  | 2.075(4) | O(26)-Nd(1)-O(7)  | 79.83(11)  |
| Zn(1)-N(2)    | 2.082(5) | O(9)-Nd(1)-O(7)   | 112.21(12) |
| Zn(1)-N(1)#1  | 2.099(5) | O(2)-Nd(1)-O(1)   | 59.97(14)  |
| Zn(1)-O(27)#1 | 2.130(4) | O(27)-Nd(1)-O(1)  | 118.02(13) |
| Zn(1)-O(32)   | 2.286(4) | O(12)-Nd(1)-O(1)  | 79.36(14)  |
| Zn(2)-O(34)   | 1.906(5) | O(10)-Nd(1)-O(1)  | 67.09(14)  |
| Zn(2)-O(24)   | 1.937(5) | O(8)-Nd(1)-O(1)   | 62.86(13)  |

|                       |            |                       |            |
|-----------------------|------------|-----------------------|------------|
| O(31)-Nd(1)-O(1)      | 110.52(15) | O(7)-Nd(3)-O(21)#1    | 110.65(13) |
| O(26)-Nd(1)-O(1)      | 169.12(12) | O(18)-Nd(3)-O(19)     | 82.23(15)  |
| O(9)-Nd(1)-O(1)       | 113.44(13) | O(7)-Nd(3)-O(19)      | 80.80(13)  |
| O(7)-Nd(1)-O(1)       | 110.67(13) | O(21)#1-Nd(3)-O(19)   | 133.89(13) |
| O(2)-Nd(1)-N(3)       | 84.98(14)  | O(18)-Nd(3)-O(21)     | 139.97(14) |
| O(27)-Nd(1)-N(3)      | 25.85(14)  | O(7)-Nd(3)-O(21)      | 70.41(13)  |
| O(12)-Nd(1)-N(3)      | 131.13(15) | O(21)#1-Nd(3)-O(21)   | 72.20(14)  |
| O(10)-Nd(1)-N(3)      | 96.10(15)  | O(19)-Nd(3)-O(21)     | 70.38(13)  |
| O(8)-Nd(1)-N(3)       | 134.76(15) | O(18)-Nd(3)-O(28)     | 75.43(15)  |
| O(31)-Nd(1)-N(3)      | 63.49(15)  | O(7)-Nd(3)-O(28)      | 132.29(14) |
| O(26)-Nd(1)-N(3)      | 26.65(14)  | O(21)#1-Nd(3)-O(28)   | 73.66(13)  |
| O(9)-Nd(1)-N(3)       | 69.96(14)  | O(19)-Nd(3)-O(28)     | 131.88(13) |
| O(7)-Nd(1)-N(3)       | 100.23(14) | O(21)-Nd(3)-O(28)     | 144.50(13) |
| O(1)-Nd(1)-N(3)       | 143.26(15) | O(18)-Nd(3)-O(11)     | 82.05(14)  |
| O(21)#1-Nd(2)-O(14)   | 148.86(15) | O(7)-Nd(3)-O(11)      | 66.74(13)  |
| O(21)#1-Nd(2)-O(9)    | 122.73(13) | O(21)#1-Nd(3)-O(11)   | 69.64(12)  |
| O(14)-Nd(2)-O(9)      | 75.45(16)  | O(19)-Nd(3)-O(11)     | 146.35(13) |
| O(21)#1-Nd(2)-O(16)   | 92.88(16)  | O(21)-Nd(3)-O(11)     | 104.89(13) |
| O(14)-Nd(2)-O(16)     | 76.61(18)  | O(28)-Nd(3)-O(11)     | 71.47(13)  |
| O(9)-Nd(2)-O(16)      | 143.66(16) | O(18)-Nd(3)-O(26)#1   | 129.38(14) |
| O(21)#1-Nd(2)-O(20)   | 119.97(13) | O(7)-Nd(3)-O(26)#1    | 132.93(13) |
| O(14)-Nd(2)-O(20)     | 86.93(16)  | O(21)#1-Nd(3)-O(26)#1 | 72.74(12)  |
| O(9)-Nd(2)-O(20)      | 77.55(14)  | O(19)-Nd(3)-O(26)#1   | 68.17(13)  |
| O(16)-Nd(2)-O(20)     | 78.22(16)  | O(21)-Nd(3)-O(26)#1   | 66.32(12)  |
| O(21)#1-Nd(2)-O(11)   | 71.12(12)  | O(28)-Nd(3)-O(26)#1   | 94.45(13)  |
| O(14)-Nd(2)-O(11)     | 99.00(16)  | O(11)-Nd(3)-O(26)#1   | 142.18(12) |
| O(9)-Nd(2)-O(11)      | 66.18(13)  | O(18)-Nd(3)-O(23)     | 80.85(14)  |
| O(16)-Nd(2)-O(11)     | 141.61(15) | O(7)-Nd(3)-O(23)      | 145.75(13) |
| O(20)-Nd(2)-O(11)     | 140.11(14) | O(21)#1-Nd(3)-O(23)   | 102.77(12) |
| O(21)#1-Nd(2)-O(19)#1 | 69.88(12)  | O(19)-Nd(3)-O(23)     | 70.54(13)  |
| O(14)-Nd(2)-O(19)#1   | 130.90(15) | O(21)-Nd(3)-O(23)     | 114.73(12) |
| O(9)-Nd(2)-O(19)#1    | 111.32(14) | O(28)-Nd(3)-O(23)     | 64.23(13)  |
| O(16)-Nd(2)-O(19)#1   | 71.72(16)  | O(11)-Nd(3)-O(23)     | 135.20(13) |
| O(20)-Nd(2)-O(19)#1   | 50.79(13)  | O(26)#1-Nd(3)-O(23)   | 51.36(12)  |
| O(11)-Nd(2)-O(19)#1   | 128.92(13) | O(18)-Nd(3)-N(3)#1    | 105.36(16) |
| O(21)#1-Nd(2)-O(30)   | 76.51(12)  | O(7)-Nd(3)-N(3)#1     | 147.90(14) |
| O(14)-Nd(2)-O(30)     | 72.36(15)  | O(21)#1-Nd(3)-N(3)#1  | 86.89(13)  |
| O(9)-Nd(2)-O(30)      | 122.23(14) | O(19)-Nd(3)-N(3)#1    | 68.09(14)  |
| O(16)-Nd(2)-O(30)     | 69.21(15)  | O(21)-Nd(3)-N(3)#1    | 91.17(14)  |
| O(20)-Nd(2)-O(30)     | 144.47(14) | O(28)-Nd(3)-N(3)#1    | 77.52(14)  |
| O(11)-Nd(2)-O(30)     | 73.12(13)  | O(11)-Nd(3)-N(3)#1    | 145.16(14) |
| O(19)#1-Nd(2)-O(30)   | 126.10(13) | O(26)#1-Nd(3)-N(3)#1  | 25.99(14)  |
| O(21)#1-Nd(2)-O(26)   | 65.77(12)  | O(23)-Nd(3)-N(3)#1    | 25.41(14)  |
| O(14)-Nd(2)-O(26)     | 140.04(14) | O(17)-Nd(4)-O(32)     | 145.46(17) |
| O(9)-Nd(2)-O(26)      | 64.89(13)  | O(17)-Nd(4)-O(25)     | 132.37(17) |
| O(16)-Nd(2)-O(26)     | 135.68(15) | O(32)-Nd(4)-O(25)     | 81.19(16)  |
| O(20)-Nd(2)-O(26)     | 80.22(13)  | O(17)-Nd(4)-O(5)      | 103.74(16) |
| O(11)-Nd(2)-O(26)     | 70.00(13)  | O(32)-Nd(4)-O(5)      | 67.31(13)  |
| O(19)#1-Nd(2)-O(26)   | 64.62(12)  | O(25)-Nd(4)-O(5)      | 83.56(15)  |
| O(30)-Nd(2)-O(26)     | 133.67(11) | O(17)-Nd(4)-O(35)     | 71.54(19)  |
| O(18)-Nd(3)-O(7)      | 76.97(15)  | O(32)-Nd(4)-O(35)     | 138.26(16) |
| O(18)-Nd(3)-O(21)#1   | 143.24(14) | O(25)-Nd(4)-O(35)     | 72.04(18)  |

|                   |            |                   |            |
|-------------------|------------|-------------------|------------|
| O(5)-Nd(4)-O(35)  | 137.29(16) | O(23)-Nd(4)-O(29) | 109.56(13) |
| O(17)-Nd(4)-O(28) | 80.81(15)  | O(17)-Nd(4)-O(6)  | 67.46(16)  |
| O(32)-Nd(4)-O(28) | 83.74(14)  | O(32)-Nd(4)-O(6)  | 125.44(14) |
| O(25)-Nd(4)-O(28) | 126.43(15) | O(25)-Nd(4)-O(6)  | 76.23(17)  |
| O(5)-Nd(4)-O(28)  | 135.10(14) | O(5)-Nd(4)-O(6)   | 61.33(14)  |
| O(35)-Nd(4)-O(28) | 87.04(16)  | O(35)-Nd(4)-O(6)  | 78.80(16)  |
| O(17)-Nd(4)-O(23) | 70.17(15)  | O(28)-Nd(4)-O(6)  | 147.92(15) |
| O(32)-Nd(4)-O(23) | 75.31(14)  | O(23)-Nd(4)-O(6)  | 106.27(14) |
| O(25)-Nd(4)-O(23) | 152.59(15) | O(29)-Nd(4)-O(6)  | 143.31(14) |
| O(5)-Nd(4)-O(23)  | 74.55(13)  | O(17)-Nd(4)-N(4)  | 99.70(17)  |
| O(35)-Nd(4)-O(23) | 135.36(17) | O(32)-Nd(4)-N(4)  | 76.68(14)  |
| O(28)-Nd(4)-O(23) | 65.05(13)  | O(25)-Nd(4)-N(4)  | 101.74(17) |
| O(17)-Nd(4)-O(29) | 118.30(16) | O(5)-Nd(4)-N(4)   | 142.40(15) |
| O(32)-Nd(4)-O(29) | 72.31(14)  | O(35)-Nd(4)-N(4)  | 78.13(16)  |
| O(25)-Nd(4)-O(29) | 75.67(15)  | O(28)-Nd(4)-N(4)  | 24.71(15)  |
| O(5)-Nd(4)-O(29)  | 136.81(14) | O(23)-Nd(4)-N(4)  | 86.51(14)  |
| O(35)-Nd(4)-O(29) | 70.42(15)  | O(29)-Nd(4)-N(4)  | 26.07(15)  |
| O(28)-Nd(4)-O(29) | 50.78(13)  | O(6)-Nd(4)-N(4)   | 156.25(15) |

---
